# Supplementary material for: Facile synthesis of exfoliated Co–Al LDH–carbon nanotube composites with high performance as supercapacitor electrodes
Source: Royal Society of Chemistry journal article supplement (doi:10.1039/c4cp02020k), 2014-01-01

**Facile Synthesis of Exfoliated Co-Al LDHs/Carbon Nanotubes Composite  
with High Performance as Supercapacitor Electrode**

Lei Yu <sup>a</sup>, Nannan Shi <sup>a</sup>, Qi Liu <sup>a,\*</sup>, Jun Wang <sup>a,c,\*</sup>, Bin Yang <sup>a</sup>, Bin Wang <sup>a</sup>,

Huijun Yan <sup>a</sup>, Yanbo Sun <sup>b</sup> and Xiaoyan Jing <sup>a</sup>

<sup>a</sup> Key Laboratory of Superlight Material and Surface Technology, Ministry of Education, Harbin Engineering University, 150001, P. R. China.

<sup>b</sup> State Key Laboratory of Theoretical and Computational Chemistry, Institute of Theoretical Chemistry, Jilin University Changchun, 130023, P. R. China.

<sup>c</sup> Institute of Advanced Marine Materials, Harbin Engineering University, 150001, P. R. China.

\* Tel: +86 451 8253 3026; Fax: +86 451 8253 3026. E-mail address: zhqw1888@sohu.com

**Fig. S1:** The photos of the colloidal suspension of exfoliated Co-Al LDHs

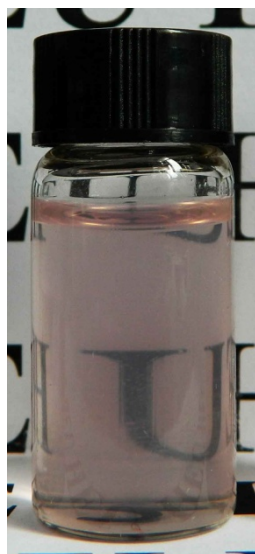

**Fig. S2:** The galvanostatic charge/discharge measurements curves of the Co-Al LDHs at various current densities.

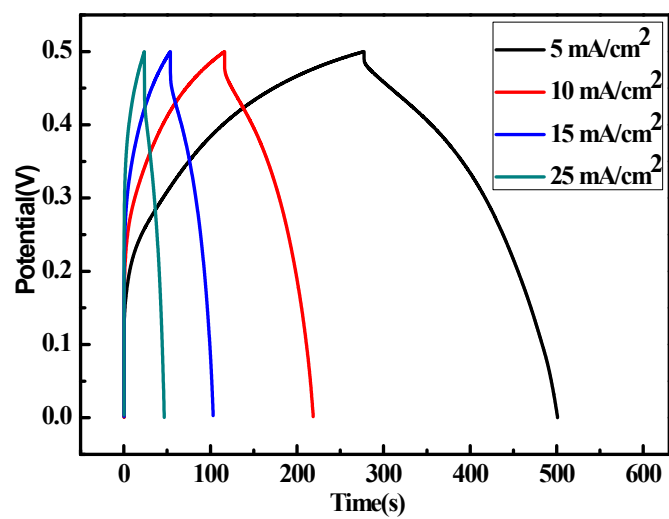

**Fig. S3:** The cyclic voltammetry curves and galvanostatic charge/discharge curves of the mixing the Co-Al LDHs and CNTs together at various current densities

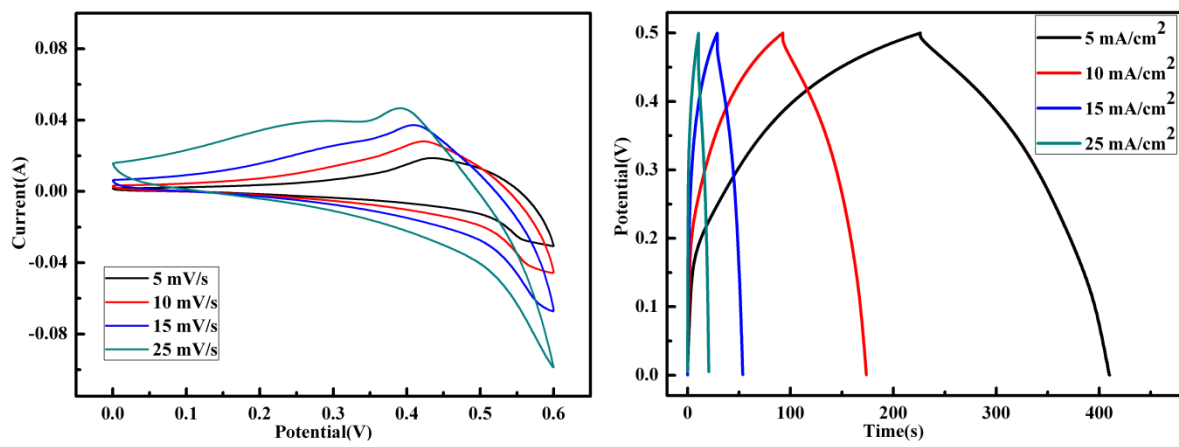

Supplement: c4cp02020k1.pdf [file c4cp02020k1.pdf]
